# Supplementary material
Source: PubMed Central journal article supplement (PMC6385895)
Supplement: NIHMS1514493-supplement-2.pdf [file NIHMS1514493-supplement-2.pdf]

**Supplementary table 1: Input regions to LC-NA and LC-GABA neurons**

| Region                 |                                        | LC-NA       |             | LC-GABA      |             | Diff. %      | t-test p value |
|------------------------|----------------------------------------|-------------|-------------|--------------|-------------|--------------|----------------|
|                        |                                        | %           | SEM         | %            | SEM         |              |                |
| Cortex                 | <b>Prefrontal (OFC+AI+Limbic+Cg)</b>   | <b>0.56</b> | <b>0.29</b> | <b>1.75</b>  | <b>0.22</b> | <b>1.18</b>  | <b>0.029</b>   |
|                        | FrA                                    | 0.00        | 0.00        | 0.29         | 0.08        | -0.29        | 0.000          |
|                        | Motor                                  | 0.53        | 0.29        | 0.96         | 0.13        | 0.43         | 0.420          |
|                        | Somatosensory                          | 0.20        | 0.13        | 0.44         | 0.06        | 0.25         | 0.361          |
|                        | Clastrum/Dorsal endopiriform           | 0.13        | 0.09        | 0.12         | 0.04        | -0.01        | 0.793          |
|                        | Retrosplenial                          | 0.00        | 0.00        | 0.07         | 0.03        | 0.07         | 0.036          |
|                        | Entorhinal                             | 0.00        | 0.00        | 0.06         | 0.03        | 0.06         | 0.091          |
|                        | Auditory                               | 0.04        | 0.04        | 0.20         | 0.11        | 0.16         | 0.256          |
|                        | Visual                                 | 0.01        | 0.01        | 0.04         | 0.02        | 0.03         | 0.548          |
| Basal forebrain        | Tubercle                               | 0.15        | 0.11        | 0.20         | 0.06        | 0.05         | 0.994          |
|                        | Accumbens                              | 0.39        | 0.26        | 0.27         | 0.08        | -0.12        | 0.629          |
|                        | Ventral pallidum                       | 0.11        | 0.11        | 0.28         | 0.10        | 0.17         | 0.577          |
|                        | External globus pallidus               | 0.09        | 0.09        | 0.18         | 0.10        | 0.09         | 0.742          |
|                        | Caudoputamen                           | 0.34        | 0.17        | 0.12         | 0.03        | -0.23        | 0.333          |
|                        | Diagonal band                          | 1.53        | 0.63        | 0.21         | 0.08        | -1.32        | 0.163          |
| Amygdoloid group       | <b>Bed nucleus of stria terminalis</b> | <b>5.89</b> | <b>1.28</b> | <b>1.70</b>  | <b>0.19</b> | <b>-4.19</b> | <b>0.046</b>   |
|                        | Central amygdala                       | 8.55        | 2.71        | 4.71         | 2.66        | -3.85        | 0.761          |
|                        | Basolateral amygdala                   | 0.00        | 0.00        | 0.09         | 0.04        | 0.09         | 0.028          |
|                        | Basomedial amygdala                    | 0.26        | 0.26        | 0.08         | 0.05        | -0.18        | 0.714          |
|                        | Interstitial nuc. of anterior comm.    | 0.49        | 0.22        | 0.27         | 0.11        | -0.22        | 0.711          |
| Hypothal.              | Preoptic nucl.                         | 3.02        | 0.87        | 0.97         | 0.30        | -2.05        | 0.137          |
|                        | Paraventricular hypo. nucl.            | 3.50        | 1.50        | 0.07         | 0.06        | -3.43        | 0.150          |
|                        | <b>Lateral hypoth. + surround</b>      | <b>6.71</b> | <b>1.11</b> | <b>2.66</b>  | <b>0.56</b> | <b>-4.06</b> | <b>0.043</b>   |
|                        | Posterior hypothalamus                 | 0.20        | 0.17        | 0.94         | 0.28        | 0.73         | 0.098          |
|                        | Supramammillary nucleus                | 0.21        | 0.14        | 0.66         | 0.22        | 0.45         | 0.291          |
| Thalamus + Subthalamus | <b>Habenula</b>                        | <b>0.17</b> | <b>0.13</b> | <b>0.88</b>  | <b>0.25</b> | <b>0.71</b>  | <b>0.037</b>   |
|                        | Zona incerta                           | 1.87        | 0.37        | 3.22         | 0.82        | 1.34         | 0.208          |
|                        | Posterior subthalamic nucl.            | 3.69        | 1.11        | 2.31         | 0.39        | -1.37        | 0.470          |
|                        | Thalamus (other)                       | 0.28        | 0.17        | 0.43         | 0.22        | 0.14         | 0.751          |
|                        | <b>Suprafascicular thalamic nucl.</b>  | <b>0.04</b> | <b>0.04</b> | <b>1.64</b>  | <b>0.54</b> | <b>1.60</b>  | <b>0.001</b>   |
| Midbrain               | Substantia nigra                       | 1.15        | 0.54        | 4.02         | 1.11        | 2.87         | 0.053          |
|                        | Ventral tegmental area                 | 0.49        | 0.23        | 0.70         | 0.15        | 0.21         | 0.473          |
|                        | Deep mesencephalic nucleus             | 5.15        | 1.49        | 5.76         | 1.20        | 0.61         | 0.852          |
|                        | Occulomotor group                      | 3.77        | 1.14        | 4.05         | 0.63        | 0.28         | 0.851          |
|                        | Red nucleus                            | 0.07        | 0.07        | 0.37         | 0.16        | 0.29         | 0.217          |
|                        | Interpeduncular nucleus                | 0.87        | 0.29        | 0.67         | 0.19        | -0.21        | 0.492          |
|                        | Periaqueductal gray                    | 4.38        | 0.95        | 3.67         | 0.19        | -0.71        | 0.604          |
|                        | Cuneiform nucleus                      | 0.00        | 0.00        | 0.50         | 0.37        | 0.50         | 0.167          |
| Colliculus             | <b>Superior colliculus</b>             | <b>2.26</b> | <b>0.61</b> | <b>10.70</b> | <b>2.77</b> | <b>8.44</b>  | <b>0.009</b>   |
|                        | Inferior colliculus                    | 2.86        | 1.29        | 1.59         | 0.70        | -1.27        | 0.407          |
| Pons                   | Pontine reticular nucleus              | 15.03       | 4.66        | 2.22         | 0.96        | -12.81       | 0.105          |
|                        | Prepositus nucleus                     | 2.56        | 0.83        | 4.39         | 1.72        | 1.83         | 0.517          |
| Medulla                | <b>Intermediate reticular nucleus</b>  | <b>0.79</b> | <b>0.58</b> | <b>10.21</b> | <b>3.46</b> | <b>9.42</b>  | <b>0.003</b>   |
|                        | Gigantocellular reticular nucleus      | 7.55        | 2.00        | 8.56         | 1.96        | 1.01         | 0.443          |
|                        | <b>Spinal trigeminal nucleus</b>       | <b>1.31</b> | <b>0.38</b> | <b>3.32</b>  | <b>0.52</b> | <b>2.01</b>  | <b>0.008</b>   |
| Cerebellu              | Cerebellum/Purkinje                    | 4.26        | 1.68        | 5.93         | 1.93        | 1.66         | 0.333          |
|                        | Cerebellum/Deep nucleus                | 7.77        | 2.31        | 6.74         | 0.70        | -1.03        | 0.670          |
|                        | Other                                  | 0.32        | 0.21        | 1.02         | 0.36        | 0.69         | 0.287          |

Regions excluded from analysis: Tegmentum (PPTg, MiTg, LDTg, PDTg), Raphe, Parabrachial nucleus, Central gray of the pons, Vestibular nucleus. N= 8 and 4 mice for LC-NA and LC-GABA conditions respectively.
